# Supplementary material for: Square-Planar vs. Trigonal Bipyramidal Geometry in Pt(II) Complexes Containing Triazole-Based Glucose Ligands as Potential Anticancer Agents
Source: Int J Mol Sci. 2021 Aug 13;22(16):8704. doi: 10.3390/ijms22168704 (PMC8395886; doi:10.3390/ijms22168704)
Supplement: Supplementary file 1 [file ijms-22-08704-s001.zip › ijms-1342307-supplementary.pdf]

# Square-planar *vs.* trigonal bipyramidal geometry in Pt(II) complexes containing triazole-based glucose ligands as potential anticancer agents

Alfonso Annunziata <sup>1</sup>, Davide Liberti <sup>1</sup>, Emiliano Bedini <sup>1</sup>, Maria Elena Cucciolito <sup>1</sup>, Domenico Loreto <sup>1</sup>, Daria Maria Monti <sup>1</sup>, Antonello Merlino <sup>1</sup> and Francesco Ruffo <sup>1,\*</sup>

<sup>1</sup> Dipartimento di Scienze Chimiche, Università di Napoli Federico II, Complesso Universitario di Monte S. Angelo, via Cintia 21, 80126 Napoli (Italy)

\* Correspondence: ruffo@unina.it

## Content

**Figure S1.** <sup>1</sup>H-NMR spectrum of **4Pt-im** in MeOD at 25 °C

**Figure S2.** COSY NMR spectrum of **4Pt-im** in MeOD at 25 °C

**Figure S3.** <sup>13</sup>C NMR spectrum of **4Pt-im** in MeOD at 25 °C

**Figure S4.** <sup>1</sup>H-NMR spectrum of **4Pt-py** in MeOD at 25 °C

**Figure S5.** COSY NMR spectrum of **4Pt-py** in MeOD at 25 °C

**Figure S6.** <sup>13</sup>C NMR spectrum of **4Pt-py** in MeOD at 25 °C

**Figure S7.** <sup>1</sup>H-NMR spectrum of **4Pt-im<sub>dep</sub>** in MeOD at 25 °C

**Figure S8.** COSY NMR spectrum of **4Pt-im<sub>dep</sub>** in MeOD at 25 °C

**Figure S9.** <sup>13</sup>C NMR spectrum of **4Pt-im<sub>dep</sub>** in MeOD at 25 °C

**Figure S10.** ESI-MS spectrum of **4Pt-im** in MeOH

**Figure S11.** ESI-MS spectrum of **4Pt-py** in MeOH

**Figure S12.** ESI-MS spectrum of **4Pt-im<sub>dep</sub>** in MeOH

**Figure S13.** <sup>1</sup>H-NMR spectra over time of **4Pt-im** in DMSO at 37 °C

**Figure S14.** <sup>1</sup>H-NMR spectra over time of **4Pt-im** in 1:1 v/v D<sub>2</sub>O : acetone-*d*<sub>6</sub> (1 mM) at 37 °C

**Figure S15.** <sup>1</sup>H-NMR spectra over time of **4Pt-py** in DMSO at 37 °C

**Figure S16.** <sup>1</sup>H-NMR spectra over time of **4Pt-py** in 9:1 v/v PB : DMSO-*d*<sub>6</sub> at 37 °C

**Figure S17.** <sup>1</sup>H-NMR spectra over time of **4Pt-py** in 1:1 v/v PB : DMSO-*d*<sub>6</sub> at 37 °C.

**Figure S18.** <sup>1</sup>H-NMR spectra over time of **4Pt-py** in 1:1 v/v D<sub>2</sub>O : acetone-*d*<sub>6</sub> (1 mM) at 37 °C (1 = start, 2 =72 h)

**Figure S19.** <sup>1</sup>H-NMR spectra over time of **4Pt-py** incubated with dGMP in 9:1 v/v PB : DMSO-*d*<sub>6</sub> at 37 °C

**Figure S20.** <sup>1</sup>H-NMR spectra over time of **4Pt-im** incubated with L-methionine in 9:1 v/v PB : DMSO-*d*<sub>6</sub> at 37 °C

**Figure S21.** <sup>1</sup>H-NMR spectra over time of **4Pt-py** incubated with L-methionine in 9:1 v/v PB : DMSO-*d*<sub>6</sub> at 37 °C

**Figure S22.** <sup>1</sup>H-NMR spectra over time of **4Pt-py** incubated with GSH in 9:1 v/v PB : DMSO-*d*<sub>6</sub> at 37 °C

**Figure S23.** ESI-MS spectrum of **2Pt-im** incubated with GSH in 9:1 v/v H<sub>2</sub>O : DMSO recorded after the dissolution.

**Table S1.** List of peaks found in the ESI-MS spectrum of the reaction mixture between **4Pt-im** and GSH after 48 h of at 37 °C.

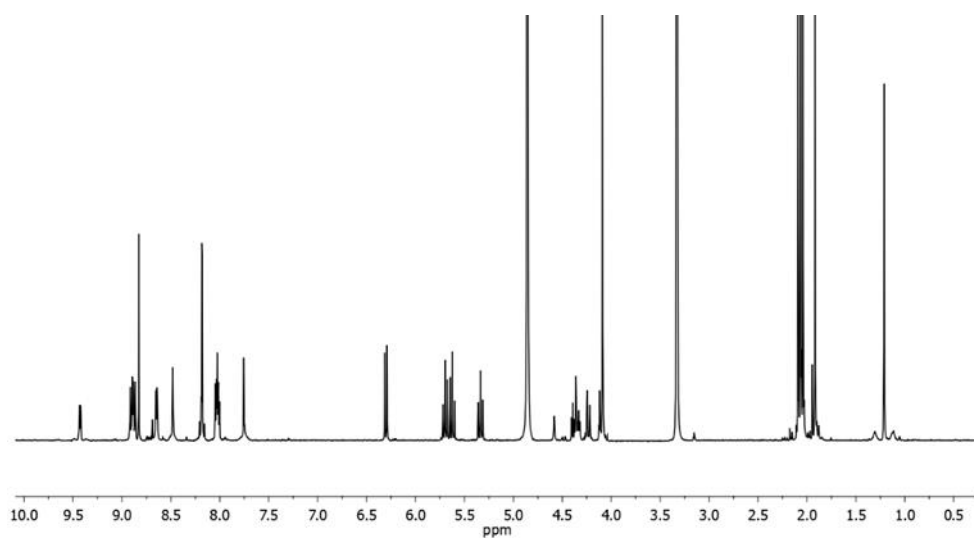

**Figure S1.**  $^1\text{H}$ -NMR spectrum of **4Pt-im** in MeOD at 25 °C

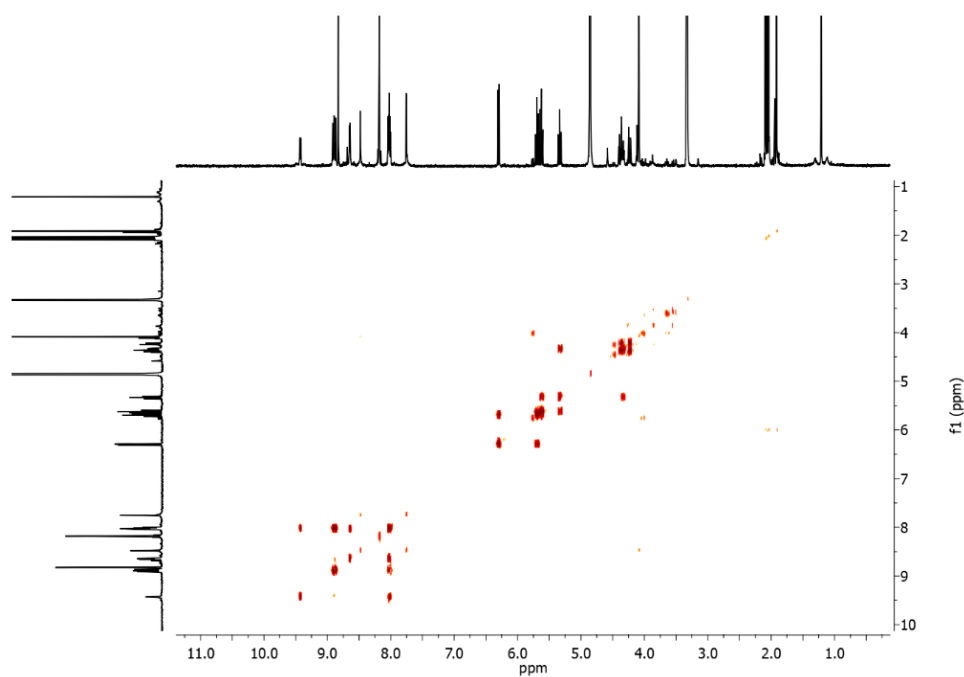

**Figure S2.** COSY NMR spectrum of **4Pt-im** in MeOD at 25 °C

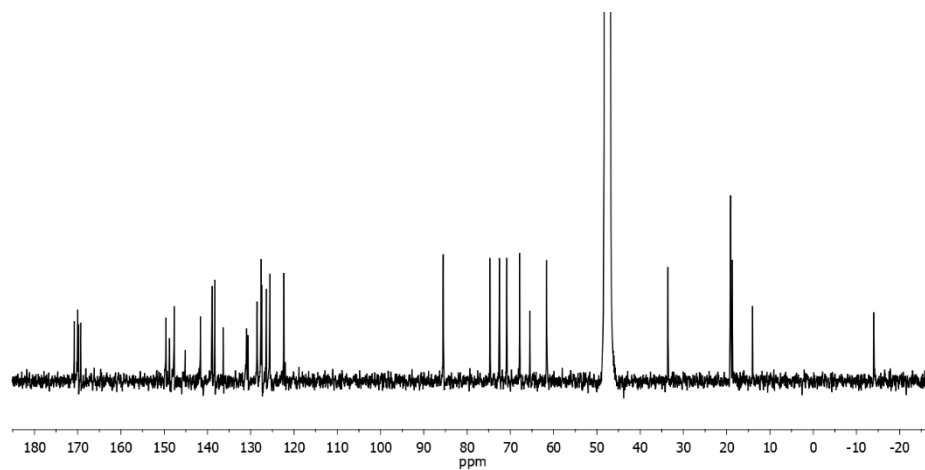

**Figure S3.**  $^{13}\text{C}$  NMR spectrum of **4Pt-im** in MeOD at 25 °C

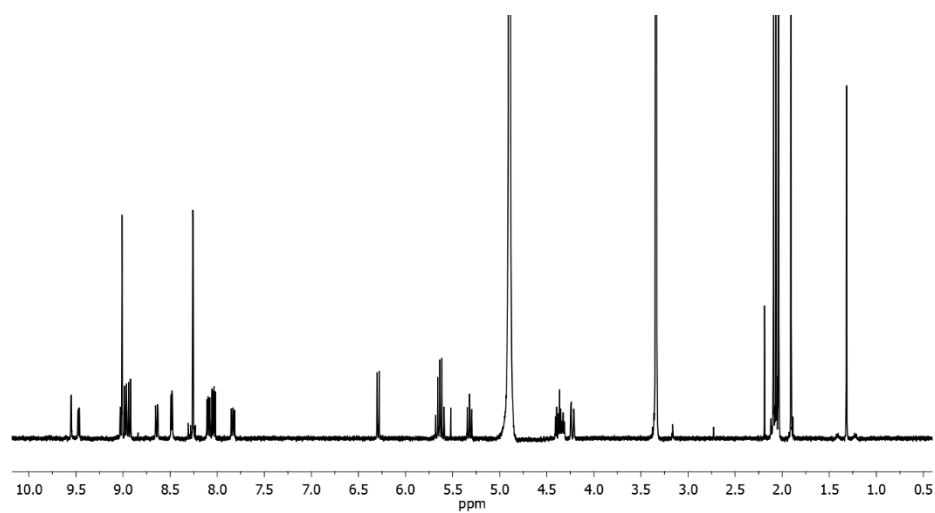

Figure S4.  $^1\text{H}$ -NMR spectrum of **4Pt-py** in MeOD at 25 °C

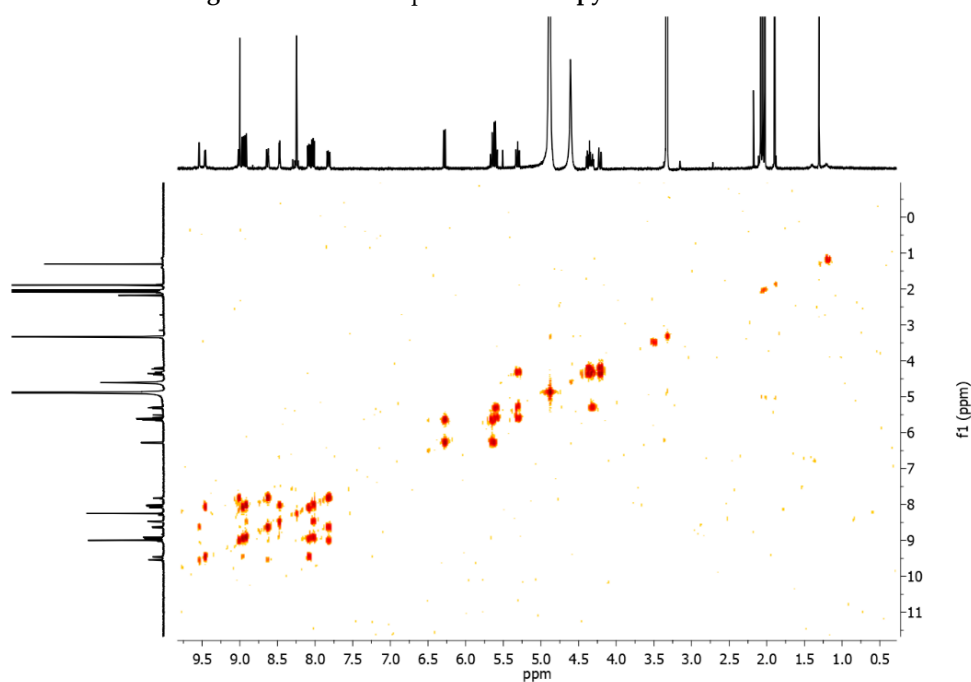

Figure S5. COSY NMR spectrum of **4Pt-py** in MeOD at 25 °C

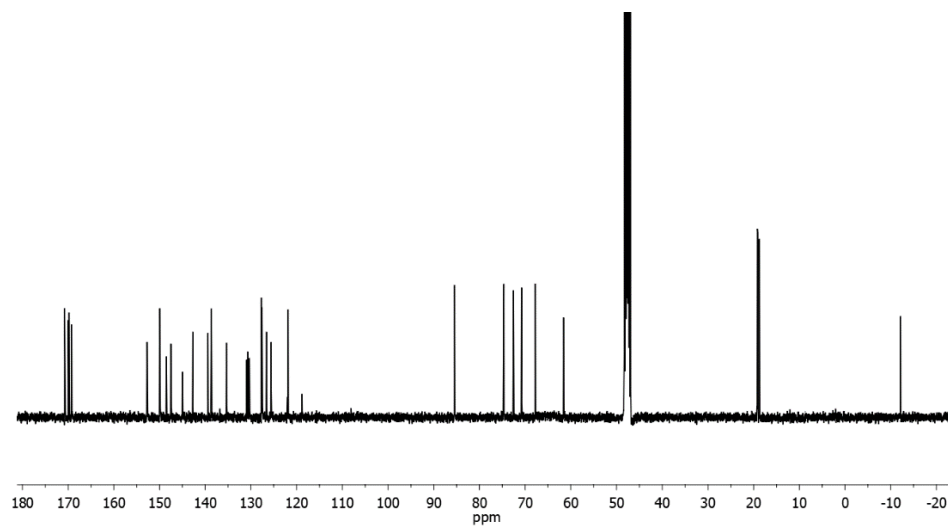

Figure S6.  $^{13}\text{C}$  NMR spectrum of **4Pt-py** in MeOD at 25 °C

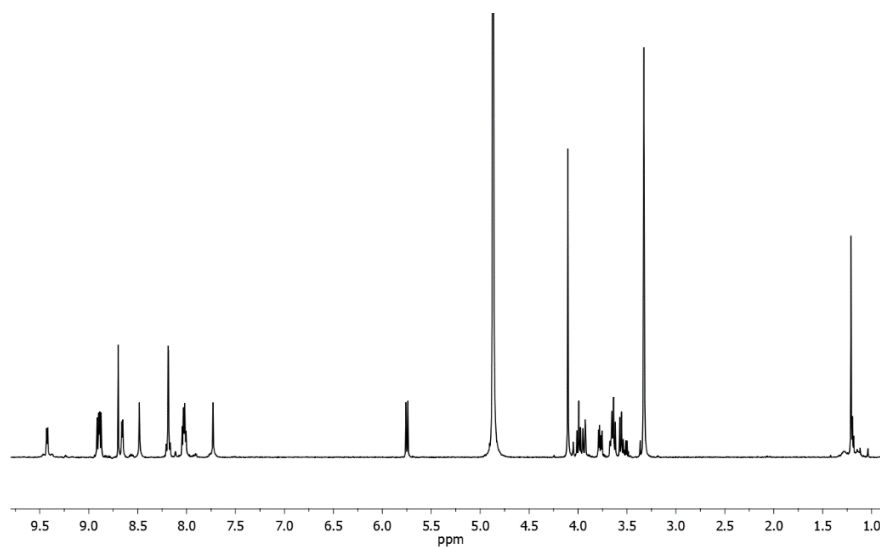

**Figure S7.**  $^1\text{H}$ -NMR spectrum of **4Pt-im<sub>dep</sub>** in MeOD at 25 °C

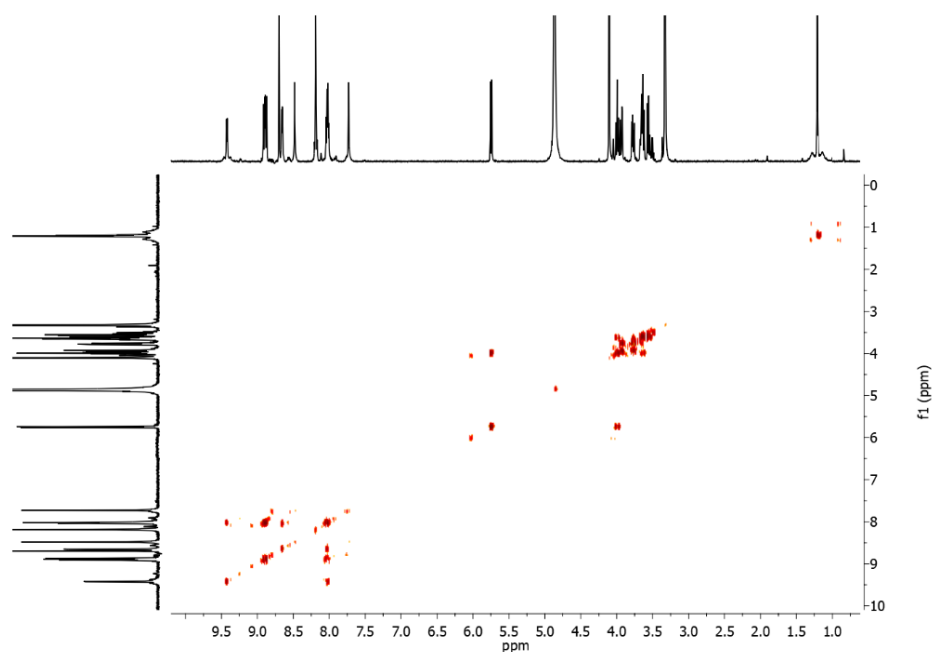

**Figure S8.** COSY NMR spectrum of **4Pt-im<sub>dep</sub>** in MeOD at 25 °C

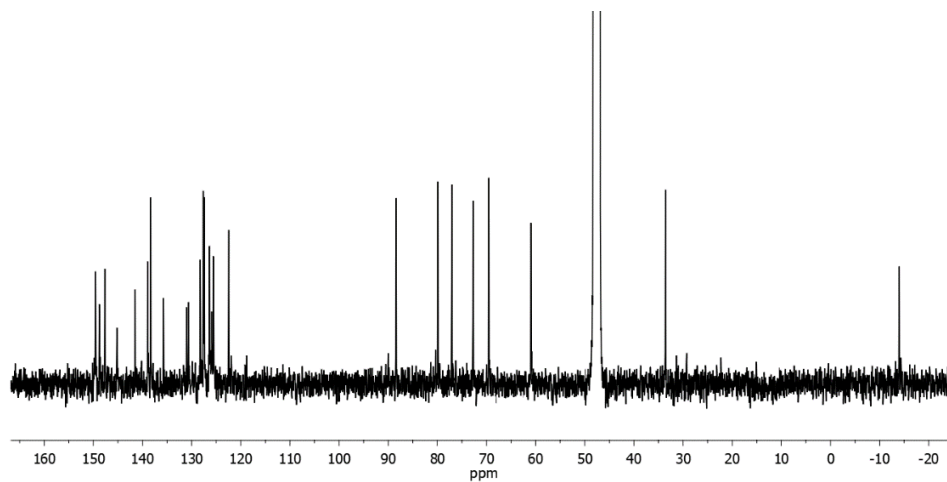

**Figure S9.**  $^{13}\text{C}$  NMR spectrum of **4Pt-im<sub>dep</sub>** in MeOD at 25 °C

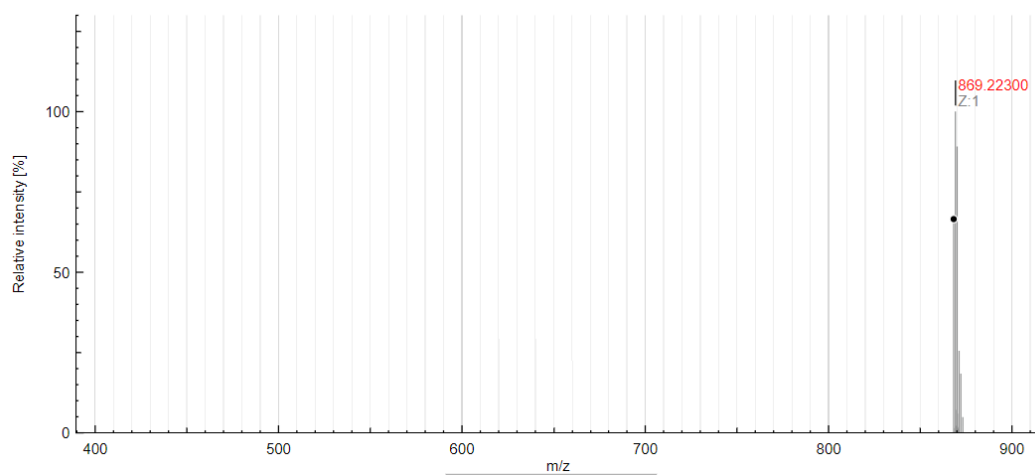

**Figure S10.** ESI-MS spectrum of **4Pt-im** in MeOH

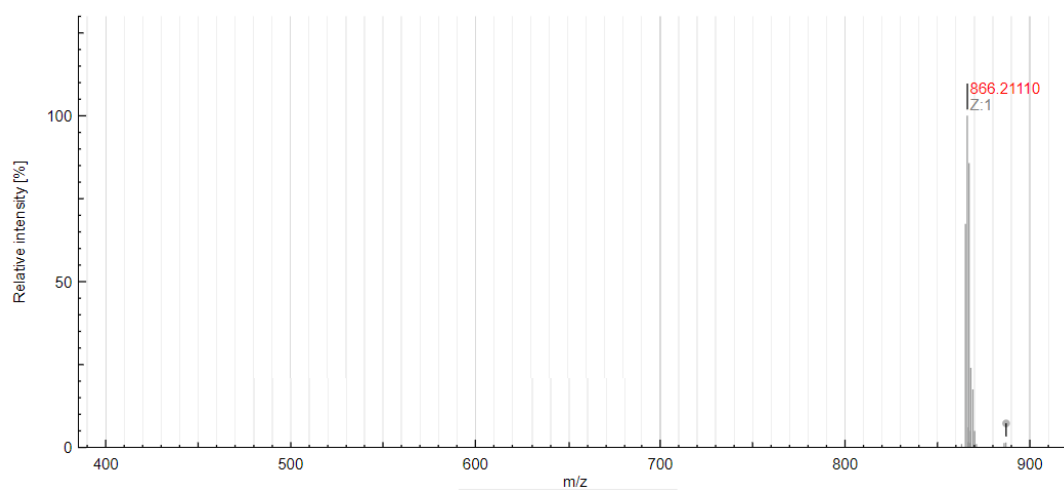

**Figure S11** ESI-MS spectrum of **4Pt-py** in MeOH

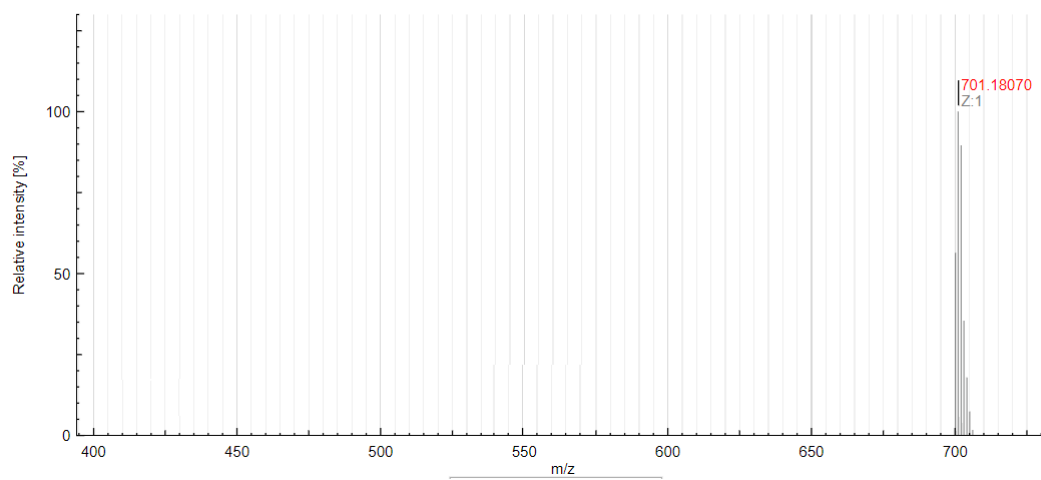

**Figure S12** ESI-MS spectrum of **4Pt-im<sub>dep</sub>** in MeOH

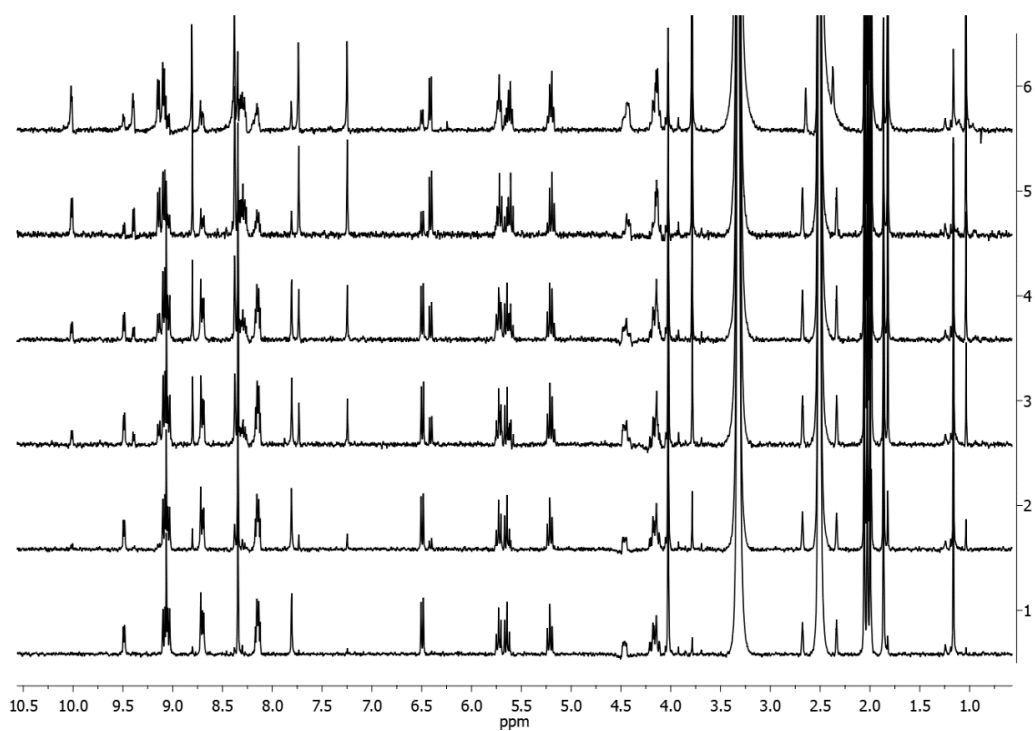

**Figure S13.**  $^1\text{H}$ -NMR spectra over time of **4Pt-im** in DMSO (1 mM) at 37 °C (1 = start, 2 = 1h, 3 = 3h, 4 = 5h, 5 = 24h, 6 = 48 h).

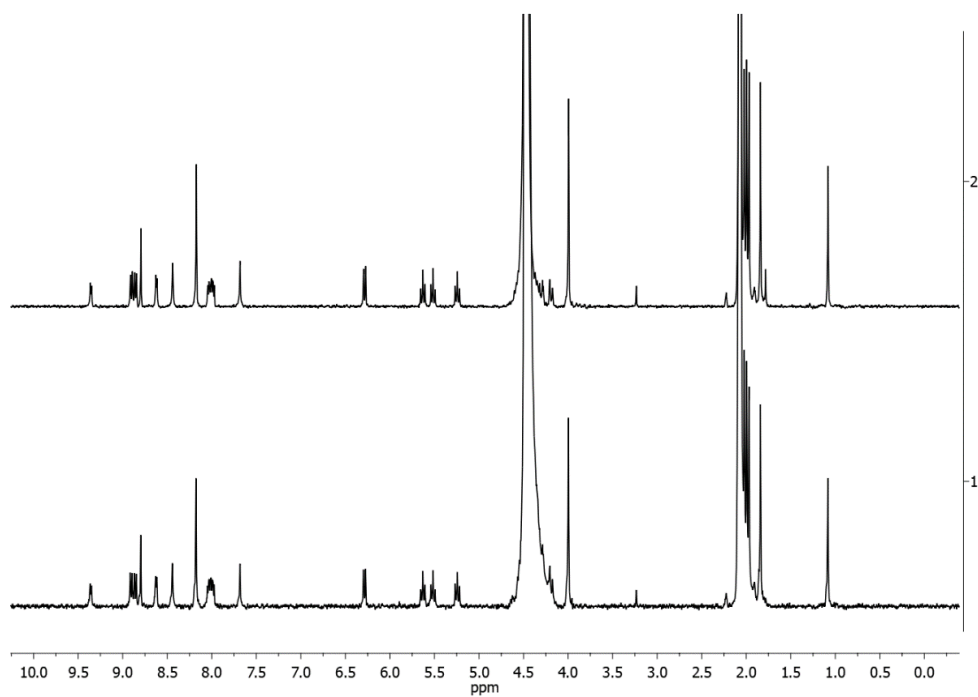

**Figure S14.**  $^1\text{H}$ -NMR spectra over time of **4Pt-im** in 1:1 v/v  $\text{D}_2\text{O}$  : acetone- $d_6$  (1 mM) at 37 °C (1 = start, 2 = 72 h).

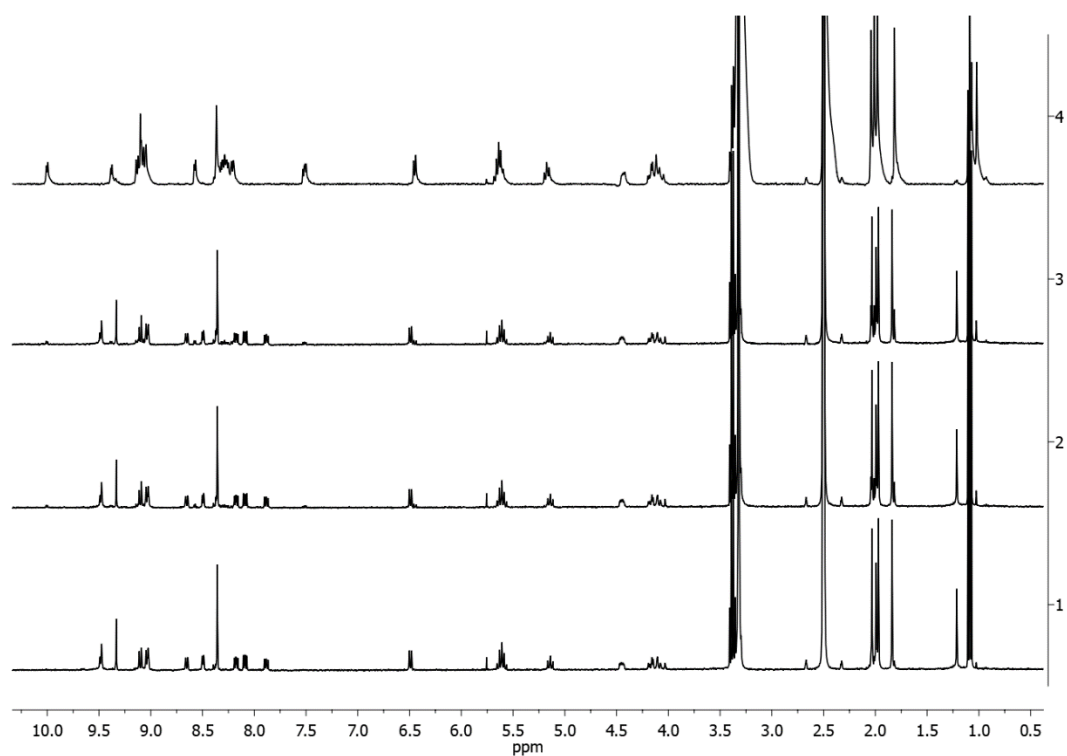

**Figure S15.**  $^1\text{H}$ -NMR spectra over time of **4Pt-py** in DMSO (1 mM) at 37 °C (1 = start, 2 = 1h, 3 = 2h, 4 = 48 h).

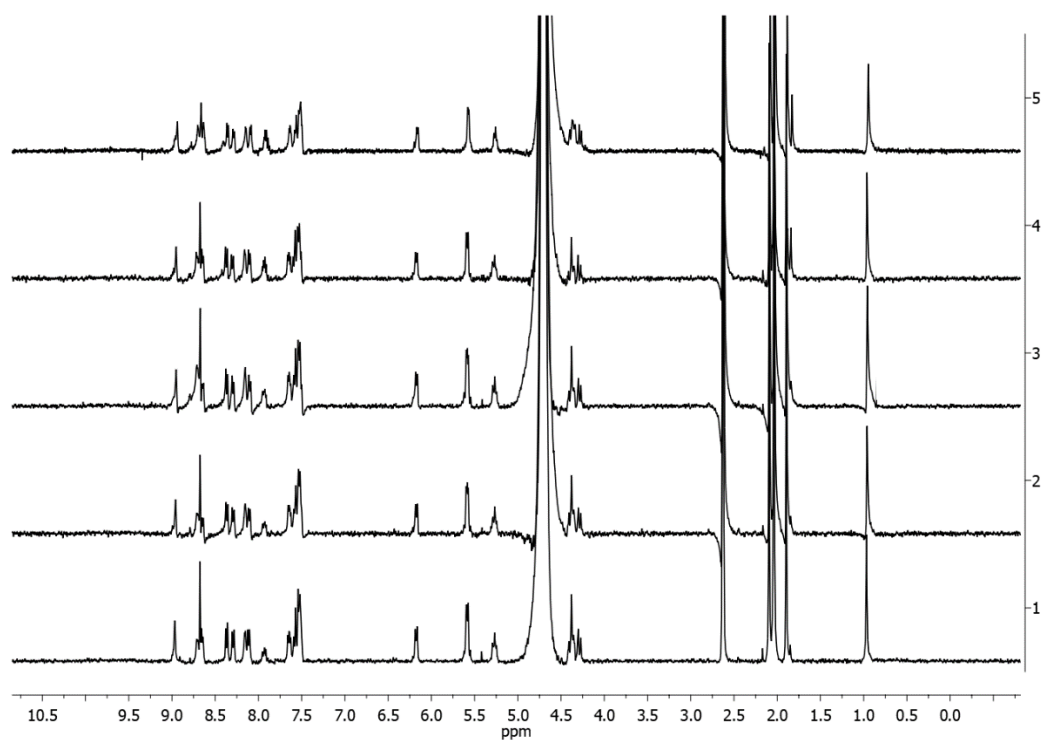

**Figure S16.**  $^1\text{H}$ -NMR spectra over time of **4Pt-py** in 9:1 v/v PB :  $\text{DMSO-}d_6$  (1 mM) at 37 °C (1 = start, 2 = 1h, 3 = 3h, 4 = 24h, 5 = 48 h).

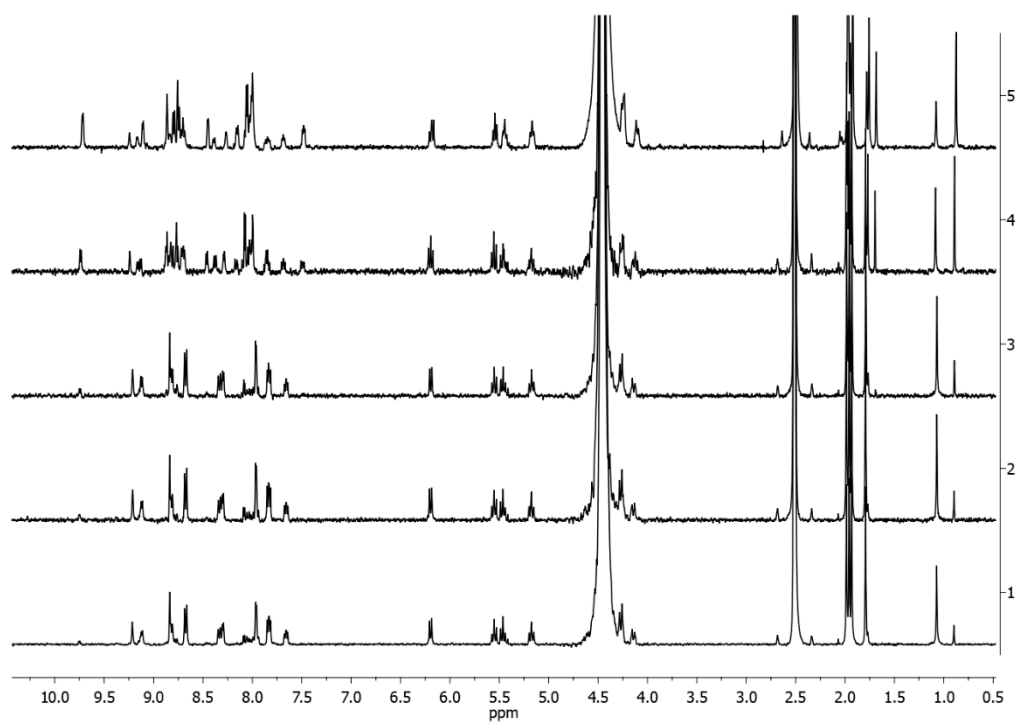

**Figure S17.**  $^1\text{H}$ -NMR spectra over time of **4Pt-py** in 1:1 v/v PB :  $\text{DMSO-}d_6$  (1 mM) at 37 °C (1 = start, 2 = 1h, 3 = 3h, 4 = 24h, 5 = 48 h).

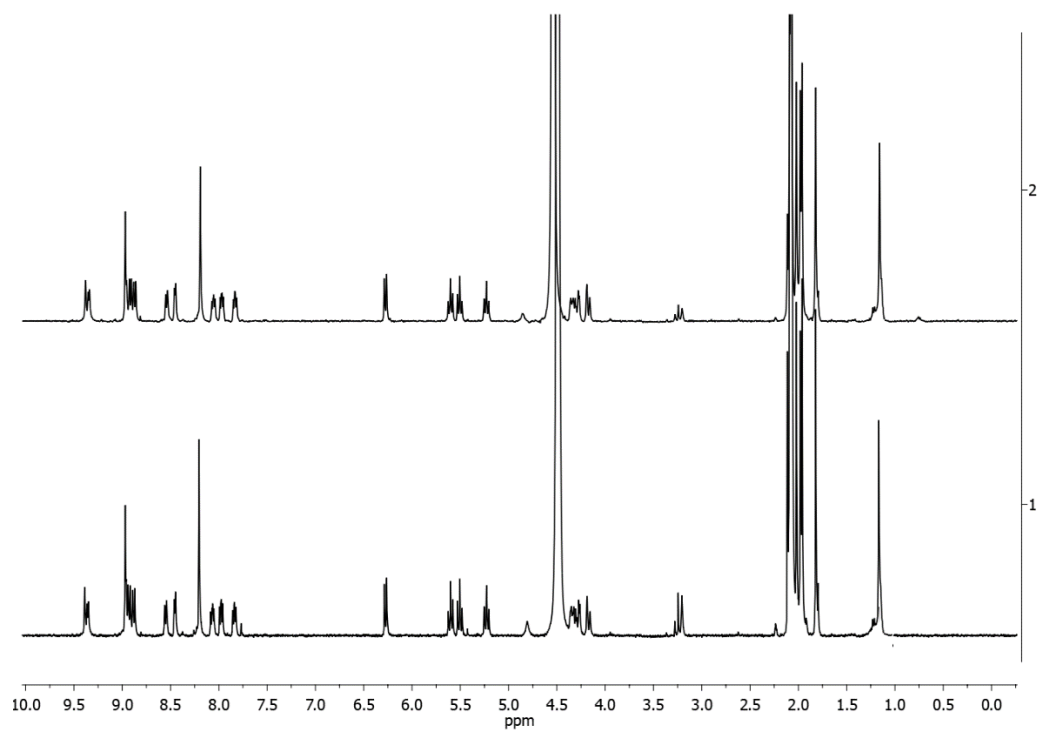

**Figure S18.**  $^1\text{H}$ -NMR spectra over time of **4Pt-py** in 1:1 v/v  $\text{D}_2\text{O}$  :  $\text{acetone-}d_6$  (1 mM) at 37 °C (1 = start, 2 = 72 h).

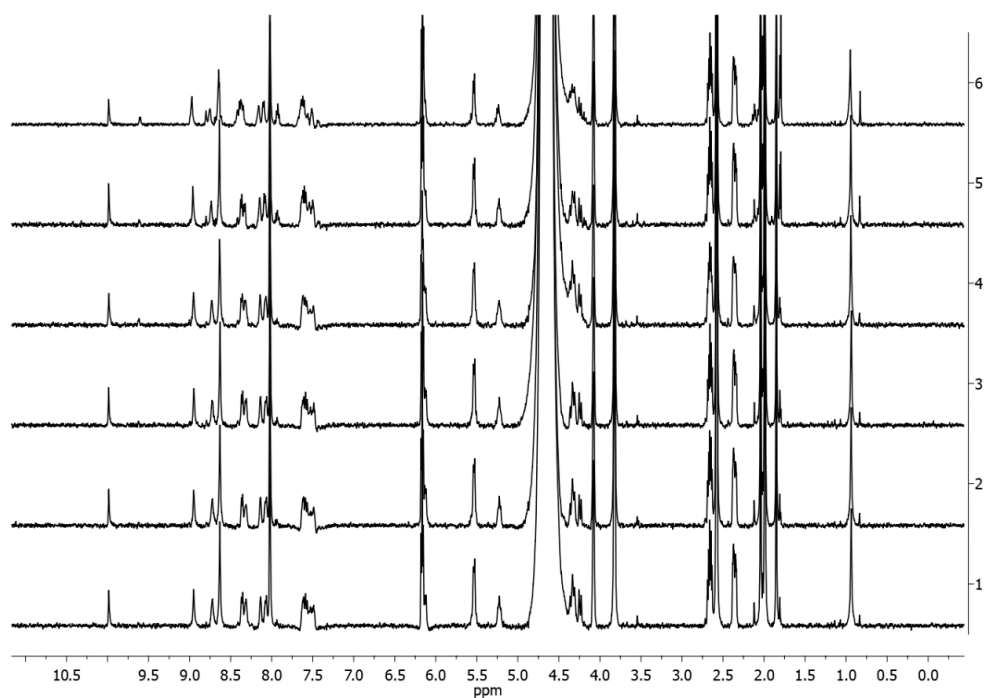

**Figure S19.**  $^1\text{H}$ -NMR spectra of **4Pt-py** incubated with dGMP in 9:1 v/v PB:DMSO- $d_6$  (1 mM of Pt, 2.5 eq of dGMP) at 37 °C at different time (1 = start, 2 = 2h, 3 = 4h, 4 = 6h, 5 = 24 h, 6 = 48 h).

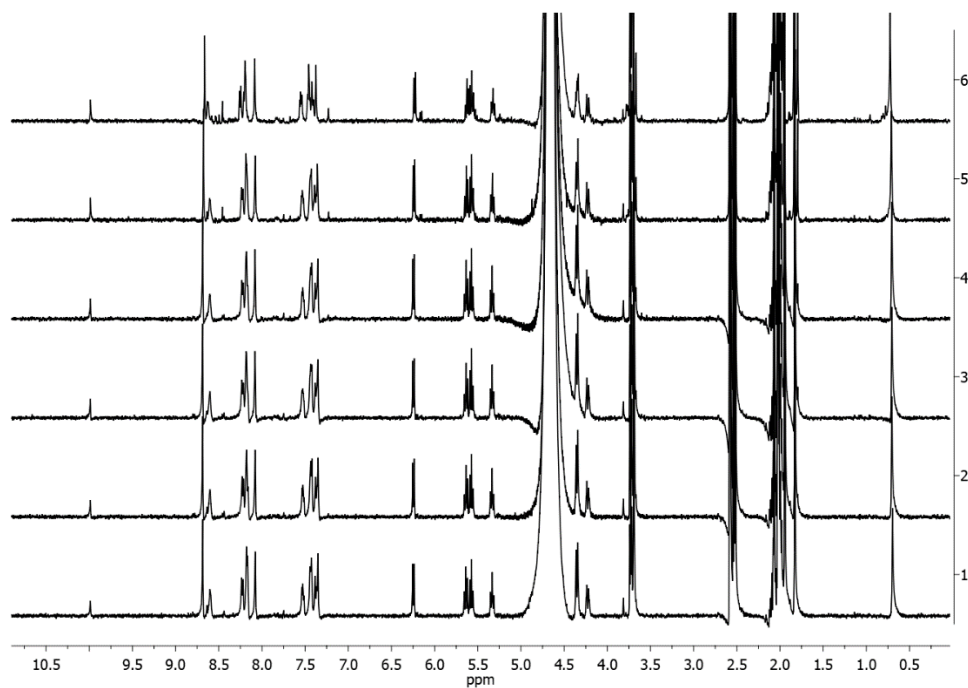

**Figure S20.**  $^1\text{H}$ -NMR spectra of **4Pt-im** incubated with L-methionine in 9:1 v/v PB : DMSO- $d_6$  (1 mM of Pt, 2.5 eq of L-methionine) at 37 °C at different time (1 = start, 2 = 2h, 3 = 4h, 4 = 6h, 5 = 24 h, 6 = 48 h).

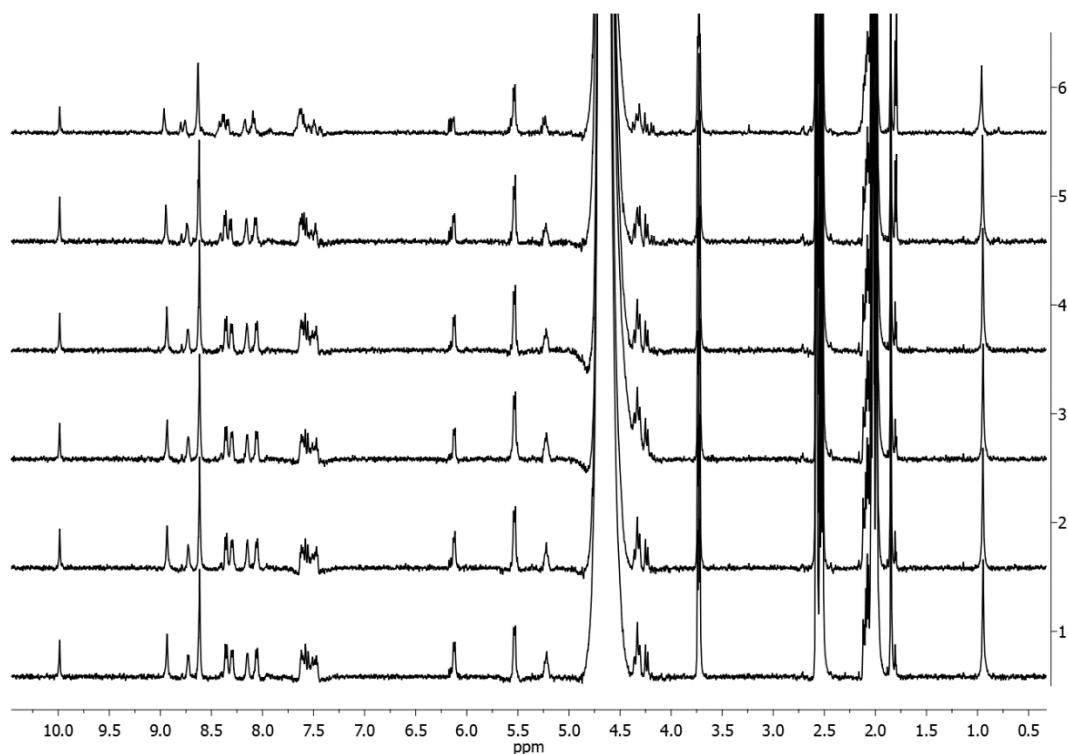

**Figure S21.**  $^1\text{H}$ -NMR spectra of **4Pt-py** incubated with L-methionine in 9:1 v/v PB:DMSO- $d_6$  (1 mM of Pt, 2.5 eq of L-methionine) at 37 °C at different time (1 = start, 2 = 2h, 3 = 4h, 4 = 6h, 5 = 24 h, 6 = 48 h).

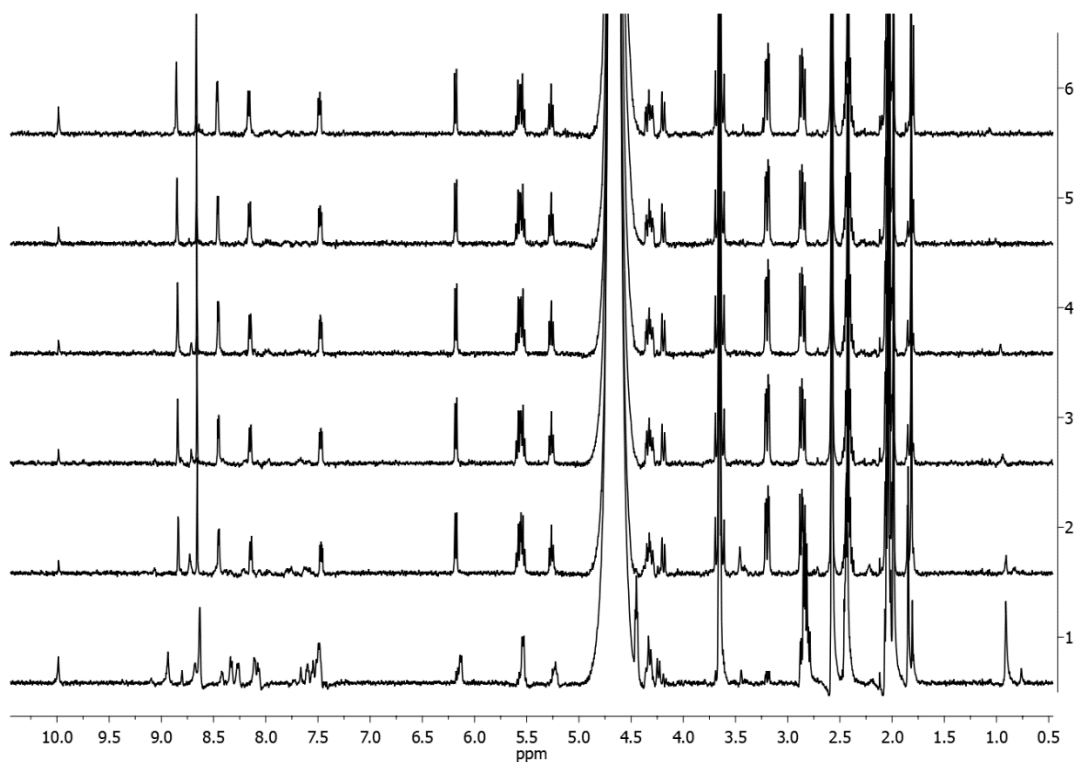

**Figure S22.**  $^1\text{H}$ -NMR spectra of **4Pt-py** incubated with GSH in 9:1 v/v PB:DMSO- $d_6$  (1 mM of Pt, 2.5 eq of GSH) at 37 °C at different time (1 = start, 2 = 2h, 3 = 4h, 4 = 6h, 5 = 24 h, 6 = 48 h).

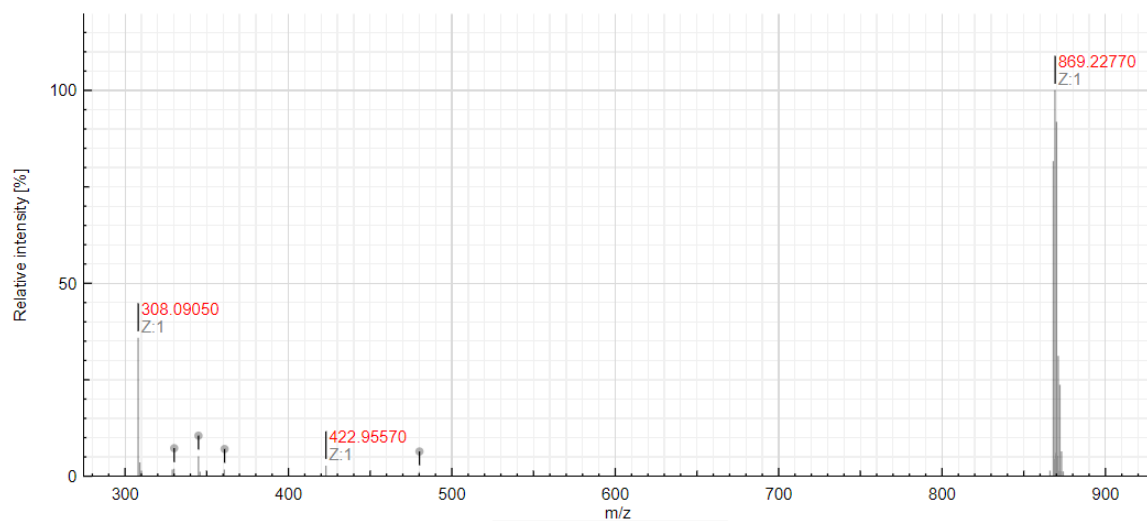

**Figure S23.** ESI-MS spectrum of **2Pt-im** incubated with GSH in 9:1 v/v H<sub>2</sub>O : DMSO recorded after the dissolution.

**Table S1.** List of peaks found in the ESI-MS spectrum of the reaction mixture between **4Pt-im** and GSH (2.5 eq.) after 48 h of at 37 °C

| Sequence          | MF                                                                                             | Ionization       | MF Mass  | m/z      | ppm      | Intensity | Similarity |
|-------------------|------------------------------------------------------------------------------------------------|------------------|----------|----------|----------|-----------|------------|
| [PtPhenL2]        | C <sub>52</sub> H <sub>58</sub> N <sub>12</sub> O <sub>18</sub> Pt                             | (+) <sub>2</sub> | 1333.364 | 666.6814 | 1.355398 | 0.161499  | 0.987963   |
| [4Pt-im]          | C <sub>33</sub> H <sub>36</sub> N <sub>7</sub> O <sub>9</sub> Pt                               | (+)              | 869.2222 | 869.2217 | 1.418583 | 3.040044  | 0.980387   |
| [Pt2Phen2GSH2-2H] | C <sub>44</sub> H <sub>48</sub> N <sub>10</sub> O <sub>12</sub> Pt <sub>2</sub> S <sub>2</sub> | (+) <sub>2</sub> | 1362.219 | 681.109  | 1.774932 | 0.039036  | 0.968953   |
| [PtMePhen]        | C <sub>13</sub> H <sub>11</sub> N <sub>2</sub> Pt                                              | (+)              | 390.057  | 390.0565 | -0.04174 | 0.087498  | 0.959729   |
| [PtMePhenDmso]    | C <sub>15</sub> H <sub>17</sub> N <sub>2</sub> OPtS                                            | (+)              | 468.071  | 468.0704 | 1.125112 | 2.147419  | 0.930783   |
| [PtPhenGSH-H]     | C <sub>22</sub> H <sub>23</sub> N <sub>5</sub> O <sub>6</sub> PtS                              | (H+)             | 680.1017 | 681.109  | 1.774932 | 0.039036  | 0.893688   |
| [im + H]          | C <sub>20</sub> H <sub>25</sub> N <sub>5</sub> O <sub>9</sub>                                  | (H+)             | 479.1652 | 480.1725 | 1.405306 | 4.714523  | 0.951694   |
